# Supplementary material for: Molecular genetic variation of animals and plants under domestication
Source: PubMed Central journal article supplement — Proc Natl Acad Sci U S A. 2022 Jul 18;119(30):e2122150119. doi: 10.1073/pnas.2122150119 (PMC9335317; doi:10.1073/pnas.2122150119), 2022-07-18
Supplement: pnas.2122150119.sapp.pdf [file pnas.2122150119.sapp.pdf]

# Molecular genetic variation of animals and plants under domestication

Leif Andersson and Michael Purugganan

## Supplementary Information Appendix

**Table S1.** Molecular characterization of Mendel's pea genes

**Table S2.** Examples of structural variants associated with phenotypic traits in domestic animals

**Table S3.** Examples of evolution of alleles in domestic animals

### Literature cited Supplementary Information Appendix

1. M. Bhattacharyya, A. M. Smith, T. H. N. Ellis, C. Hedley, C. Martin, The wrinkled-seed character of pea described by Mendel is caused by a transposon-like insertion in a gene encoding starch-branching enzyme. *Cell* **60**, 115–122 (1990).
2. D.R. Lester, J. J. Ross, P. J. Davies, J. B. Reid, Mendel's stem length gene (*Le*) encodes gibberellin 3b-Hydroxylase. *Plant Cell* **9**, 1435–1443 (1997).
3. D.N. Martin, W. M. Proebsting, P. Hedden, Mendel's dwarfing gene: cDNAs from the *Le* alleles and function of the expressed proteins. *Proc. Natl. Acad. Sci. USA* **94**, 8907–8911 (1997).
4. Y. Sato, R. Morita, M. Nishimura, H. Yamaguchi, M. Kusaba, Mendel's green cotyledon gene encodes a positive regulator of the chlorophyll-degrading pathway. *Proc. Natl. Acad. Sci. USA* **104**, 14169–14174 (2007).
5. S. Aubry, S. Mani, S. Hörtensteiner, Stay-green protein, defective in Mendel's green cotyledon mutant, acts independent and upstream of pheophorbide a oxygenase in the chlorophyll catabolic pathway. *Plant Mol. Biol.* **67**, 243–256 (2008).
6. R.P. Hellens *et al* , Identification of Mendel's white flower character. *PLoS ONE* **5**, 1–8 (2010).
7. K. Durkin, *et al.*, Serial translocation by means of circular intermediates underlies colour sidedness in cattle. *Nature* **482**, 81-84 (2012).
8. D. Wright *et al.*, Copy number variation in intron 1 of *SOX5* causes the Pea-comb phenotype in chickens. *PLoS Genet* **5**, e1000512 (2009).
9. F. Imsland *et al.*, The Rose-comb mutation in chickens constitutes a structural rearrangement causing both altered comb morphology and defective sperm motility. *PLoS Genet.* **8**, e1002775 (2012).
10. U. Gunnarsson *et al.*, The Dark brown plumage color in chickens is caused by an 8.3 kb deletion upstream of *SOX10*. *Pigment Cell Melanoma Res* **24**, 268-274 (2011).
11. C. Mou, *et al.*, Cryptic patterning of avian skin confers a developmental facility for loss of neck feathering. *PLoS Biol.* **9**, e1001028 (2011).
12. B. Dorshorst, *et al.*, A complex genomic rearrangement involving the *Endothelin 3* locus causes dermal hyperpigmentation in the chicken. *PLoS Genet.* **7**, e1002412 (2011).
13. Z. Wang, An EAV-HP insertion in 5' Flanking region of *SLCO1B3* causes blue eggshell in the chicken. *PLoS Genet* **9**, e1003183 (2013).

14. H. Matsumine *et al.*, Aromatase mRNA in the extragonadal tissues of chickens with the henny-feathering trait is derived from a distinctive promoter structure that contains a segment of a retroviral long terminal repeat. Functional organization of the Sebright, Leghorn, and Campine aromatase genes. *J Biol Chem* **266**, 19900-19907 (1991).
15. J. Li *et al.*, Characterization of the endogenous retrovirus insertion in *CYP19A1* associated with henny feathering in chicken. *Mobile DNA* **10**, 38 (2019).
16. C. Bortoluzzi *et al.*, Parallel genetic origin of foot feathering in birds. *Mol Biol Evol* **37**, 2465-2476 (2020).
17. J. Li *et al.*, Mutations upstream of the *TBX5* and *PITX1* transcription factor genes are associated with feathered legs in the domestic chicken. *Mol Biol Evol* **37**, 2477-2486 (2020).
18. J. Li *et al.*, The crest phenotype in domestic chicken is caused by a 195 bp duplication in the intron of *HOXC10*. *G3* **11**, jkaa048 (2021).
19. E.K. Karlsson *et al.*, Efficient mapping of mendelian traits in dogs through genome-wide association. *Nat Genet* **39**, 1321-1328 (2007).
20. H.G. Parker *et al.*, An expressed *fgf4* retrogene is associated with breed-defining chondrodysplasia in domestic dogs. *Science* **325**, 995-998 (2009).
21. M. Olsson *et al.*, A novel unstable duplication upstream of *HAS2* predisposes to a breed-defining skin phenotype and a periodic fever syndrome in Chinese Shar-Pei dogs. *PLoS Genet* **7**, e1001332 (2011).
22. E. Axelsson *et al.*, The genomic signature of dog domestication reveals adaptation to a starch-rich diet. *Nature* **495**, 360-364 (2013).
23. E. Pailhoux *et al.*, A 11.7-kb deletion triggers intersexuality and polledness in goats. *Nat. Genet.* **29**, 453-458 (2001).
24. F. Menzi *et al.*, Genomic amplification of the caprine *EDNRA* locus might lead to a dose dependent loss of pigmentation. *Sci Rep* **6**, 28438 (2016).
25. J. Henkel *et al.*, Selection signatures in goats reveal copy number variants underlying breed-defining coat color phenotypes. *PLoS Genet* **15**, e1008536 (2019).
26. G. Rosengren Pielberg *et al.*, A cis-acting regulatory mutation causes premature hair greying and susceptibility to melanoma in the horse. *Nat Genet* **40**, 1004-1009 (2008).
27. S.A. Brooks *et al.*, A chromosome inversion near the *KIT* gene and the Tobiano spotting pattern in horses. *Cytogenet. Genome Res.* **119**, 225-230 (2008).
28. R.R. Bellone *et al.*, Evidence for a retroviral insertion in *TRPM1* as the cause of congenital stationary night blindness and leopard complex spotting in the horse. *PLoS One* **8**, e78280 (2013).
29. F. Imsland *et al.*, Regulatory mutations in *TBX3* disrupt asymmetric hair pigmentation that underlies Dun camouflage color in horses. *Nat Genet* **48**, 152-158 (2016).
30. C.-J. Rubin *et al.*, Strong signatures of selection in the domestic pig genome. *Proc. Natl. Acad. Sci. USA* **109**, 19529-19536 (2012).
31. E.T. Domyan *et al.*, Molecular shifts in limb identity underlie development of feathered feet in two domestic avian species. *Elife* **5**, e12115 (2016).
32. M. Carneiro *et al.*, Dwarfism and altered craniofacial development in rabbits is caused by a 12.1 kb deletion at the *HMG2* locus. *Genetics* **205**, 955-965 (2017).
33. B.J. Norris, V.A. Whan, A gene duplication affecting expression of the ovine *ASIP* gene is responsible for white and black sheep. *Genome Res.* **18**, 1282-1293 (2008).
34. M. Johansson Moller *et al.*, Pigs with the dominant white coat color phenotype carry a duplication of the *KIT* gene encoding the mast/stem cell growth factor receptor. *Mamm. Genome* **7**, 822-830 (1996).

35. E. Giuffra *et al.*, The Belt mutation in pigs is an allele at the Dominant white (*I/KIT*) locus. *Mamm. Genome* **10**, 1132-1136 (1999).
36. S. Marklund *et al.*, Molecular basis for the dominant white phenotype in the domestic pig. *Genome Res.* **8**, 826-833 (1998).
37. J.M.H. Kijas *et al.*, A frameshift mutation in *MC1R* and a high frequency of somatic reversions cause black spotting in pigs. *Genetics* **158**, 779-785 (2001).
38. S. Kerje *et al.*, The Dominant white, Dun and Smoky color variants in chicken are associated with insertion/deletion polymorphisms in the *PMEL17* gene. *Genetics* **168**, 1507-1518 (2004).
39. L. Andersson *et al.*, "The genetic basis for pigmentation phenotypes in poultry" in *Advances in Poultry Genetics and Genomics*, S. Aggrey, H. Zhou, M. Tixier-Boichard M, D.D. Rhoads, Eds. (Burleigh Dodds, Cambridge, UK, 2020).

**Table S1.** Molecular characterization of Mendel's pea genes

| Gene      | Trait                | Phenotype             | Gene Function                   | Mutation                            | Ref.  |
|-----------|----------------------|-----------------------|---------------------------------|-------------------------------------|-------|
| <i>R</i>  | Seed shape           | Round vs.<br>Wrinkled | Starch branching<br>enzyme 1    | 0.8-kb TE insertion                 | (1)   |
| <i>LE</i> | Stem length          | Tall vs.<br>Dwarf     | Giberellic acid 3-<br>oxidase 1 | G-to-A missense<br>substitution     | (2,3) |
| <i>I</i>  | Cotyledon<br>color   | Yellow vs.<br>Green   | Stay-green gene                 | 6-bp insertion                      | (4,5) |
| <i>A</i>  | Seed/flower<br>color | Purple vs.<br>White   | bHLH transcription<br>factor    | G-to-A splice donor<br>substitution | (6)   |

1. M. Bhattacharyya, A. M. Smith, T. H. N. Ellis, C. Hedley, C. Martin, The wrinkled-seed character of pea described by Mendel is caused by a transposon-like insertion in a gene encoding starch-branching enzyme. *Cell* **60**, 115–122 (1990).
2. D.R. Lester, J. J. Ross, P. J. Davies, J. B. Reid, Mendel's stem length gene (*Le*) encodes gibberellin 3b-Hydroxylase. *Plant Cell* **9**, 1435–1443 (1997).
3. D.N. Martin, W. M. Proebsting, P. Hedden, Mendel's dwarfing gene: cDNAs from the *Le* alleles and function of the expressed proteins. *Proc. Natl. Acad. Sci. USA* **94**, 8907–8911 (1997).
4. Y. Sato, R. Morita, M. Nishimura, H. Yamaguchi, M. Kusaba, Mendel's green cotyledon gene encodes a positive regulator of the chlorophyll-degrading pathway. *Proc. Natl. Acad. Sci. USA* **104**, 14169–14174 (2007).
5. S. Aubry, S. Mani, S. Hörtensteiner, Stay-green protein, defective in Mendel's green cotyledon mutant, acts independent and upstream of pheophorbide a oxygenase in the chlorophyll catabolic pathway. *Plant Mol. Biol.* **67**, 243–256 (2008).
6. R.P. Hellens *et al* , Identification of Mendel's white flower character. *PLoS ONE* **5**, 1–8 (2010).

**Table S2.** Examples of structural variants associated with phenotypic traits in domestic animals

| Species | Trait                                           | Mutation                         | Gene(s)                               |
|---------|-------------------------------------------------|----------------------------------|---------------------------------------|
| Cattle  | Color sidedness                                 | 492 kb translocation             | <i>KIT</i> (7)                        |
| Chicken | Pea-comb                                        | copy number expansion            | <i>SOX5</i> (8)                       |
|         | Rose-comb                                       | 7.4 Mb inversion                 | <i>MNR2</i> (9)                       |
|         | Dark brown color                                | 8.3 kb deletion                  | <i>SOX10</i> (10)                     |
|         | Naked neck                                      | ~ 70 kb translocation            | <i>BMP12</i> (11)                     |
|         | Fibromelanosis                                  | complex                          | <i>EDN3</i> (12)                      |
|         | Blue eggshell                                   | retroviral insertion             | <i>SLCO1B3</i> (13)                   |
|         | Henny feathering                                | retroviral insertion             | <i>CYP19A1</i> (14,15)                |
|         | Feathered leg                                   | 17.7 kb deletion                 | <i>PITX1</i> (16, 17)                 |
|         | Crest                                           | 195 bp duplication               | <i>HOXC10</i> (18)                    |
| Dog     | Hair ridge                                      | 133 kb duplication               | <i>FGF3, FGF4, FGF18, ORAOV1</i> (19) |
|         | Chondrodysplasia                                | retrogene insertion              | <i>FGF4</i> (20)                      |
|         | Wrinkles <sup>d</sup>                           | 16.1 kb duplication <sup>d</sup> | <i>HAS2</i> (21)                      |
|         | Amylase activity                                | ~ 8 kb duplication               | <i>AMY2B</i> (22)                     |
|         | Polled <sup>e</sup>                             | 11.7 kb deletion                 | <i>PISRT1, FOXL2</i> (23)             |
| Goat    | Coat color                                      | copy number variation            | <i>EDNRA</i> (24)                     |
|         | Coat color                                      | copy number variation            | <i>ASIP</i> (25)                      |
|         | Coat color                                      | copy number variation            | <i>KIT</i> (25)                       |
|         | Greying with age <sup>f</sup>                   | 4.6 kb duplication               | <i>STX17, NR4A3</i> (26)              |
| Horse   | Tobiano white spotting                          | ~ 40 Mb inversion                | <i>KIT</i> (27)                       |
|         | Leopard spotting,<br>stationary night blindness | retroviral insertion             | <i>TRPM1</i> (28)                     |
|         | Non-dun color                                   | 1.6 kb deletion                  | <i>TBX3</i> (29)                      |
|         | Dominant white color                            | several duplications             | <i>KIT</i> (30)                       |
| Pigeon  | Feathered leg                                   | 44 kb deletion                   | <i>PITX1</i> (31)                     |
|         | Recessive red plumage                           | 7.5 kb deletion                  | <i>SOX10</i> (31)                     |
|         | Recessive red plumage                           | 2.5 kb deletion                  | <i>SOX10</i> (31)                     |
| Rabbit  | Dwarf                                           | 12.1 kb deletion                 | <i>HMGA2</i> (32)                     |

7. K. Durkin, *et al.*, Serial translocation by means of circular intermediates underlies colour sidedness in cattle. *Nature* **482**, 81-84 (2012).
8. D. Wright *et al.*, Copy number variation in intron 1 of *SOX5* causes the Pea-comb phenotype in chickens. *PLoS Genet* **5**, e1000512 (2009).
9. F. Imsland *et al.*, The Rose-comb mutation in chickens constitutes a structural rearrangement causing both altered comb morphology and defective sperm motility. *PLoS Genet.* **8**, e1002775 (2012).
10. U. Gunnarsson *et al.*, The Dark brown plumage color in chickens is caused by an 8.3 kb deletion upstream of *SOX10*. *Pigment Cell Melanoma Res* **24**, 268-274 (2011).
11. C. Mou, *et al.*, Cryptic patterning of avian skin confers a developmental facility for loss of neck feathering. *PLoS Biol.* **9**, e1001028 (2011).
12. B. Dorshorst, *et al.*, A complex genomic rearrangement involving the *Endothelin 3* locus causes dermal hyperpigmentation in the chicken. *PLoS Genet.* **7**, e1002412 (2011).
13. Z. Wang, An EAV-HP insertion in 5' Flanking region of *SLCO1B3* causes blue eggshell in the chicken. *PLoS Genet* **9**, e1003183 (2013).
14. H. Matsumine *et al.*, Aromatase mRNA in the extragonadal tissues of chickens with the henny-feathering trait is derived from a distinctive promoter structure that contains a segment of a retroviral long terminal repeat. Functional organization of the Sebright, Leghorn, and Campine aromatase genes. *J Biol Chem* **266**, 19900-19907 (1991).
15. J. Li *et al.*, Characterization of the endogenous retrovirus insertion in *CYP19A1* associated with henny feathering in chicken. *Mobile DNA* **10**, 38 (2019).
16. C. Bortoluzzi *et al.*, Parallel genetic origin of foot feathering in birds. *Mol Biol Evol* **37**, 2465-2476 (2020).
17. J. Li *et al.*, Mutations upstream of the *TBX5* and *PITX1* transcription factor genes are associated with feathered legs in the domestic chicken. *Mol Biol Evol* **37**, 2477-2486 (2020).
18. J. Li *et al.*, The crest phenotype in domestic chicken is caused by a 195 bp duplication in the intron of *HOXC10*. *G3* **11**, jkaa048 (2021).
19. E.K. Karlsson *et al.*, Efficient mapping of mendelian traits in dogs through genome-wide association. *Nat Genet* **39**, 1321-1328 (2007).
20. H.G. Parker *et al.*, An expressed *fgf4* retrogene is associated with breed-defining chondrodysplasia in domestic dogs. *Science* **325**, 995-998 (2009).
21. M. Olsson *et al.*, A novel unstable duplication upstream of *HAS2* predisposes to a breed-defining skin phenotype and a periodic fever syndrome in Chinese Shar-Pei dogs. *PLoS Genet* **7**, e1001332 (2011).
22. E. Axelsson *et al.*, The genomic signature of dog domestication reveals adaptation to a starch-rich diet. *Nature* **495**, 360-364 (2013).
23. E. Pailhoux *et al.*, A 11.7-kb deletion triggers intersexuality and polledness in goats. *Nat. Genet.* **29**, 453-458 (2001).
24. F. Menzi *et al.*, Genomic amplification of the caprine *EDNRA* locus might lead to a dose dependent loss of pigmentation. *Sci Rep* **6**, 28438 (2016).
25. J. Henkel *et al.*, Selection signatures in goats reveal copy number variants underlying breed-defining coat color phenotypes. *PLoS Genet* **15**, e1008536 (2019).
26. G. Rosengren Pielberg *et al.*, A cis-acting regulatory mutation causes premature hair greying and susceptibility to melanoma in the horse. *Nat Genet* **40**, 1004-1009 (2008).

27. S.A. Brooks *et al.*, A chromosome inversion near the KIT gene and the Tobiano spotting pattern in horses. *Cytogenet. Genome Res.* **119**, 225-230 (2008).
28. R.R. Bellone *et al.*, Evidence for a retroviral insertion in TRPM1 as the cause of congenital stationary night blindness and leopard complex spotting in the horse. *PLoS One* **8**, e78280 (2013).
29. F. Imsland *et al.*, Regulatory mutations in TBX3 disrupt asymmetric hair pigmentation that underlies Dun camouflage color in horses. *Nat Genet* **48**, 152-158 (2016).
30. C.-J. Rubin *et al.*, Strong signatures of selection in the domestic pig genome. *Proc. Natl. Acad. Sci. USA* **109**, 19529-19536 (2012).
31. E.T. Domyan *et al.*, Molecular shifts in limb identity underlie development of feathered feet in two domestic avian species. *Elife* **5**, e12115 (2016).
32. M. Carneiro *et al.*, Dwarfism and altered craniofacial development in rabbits is caused by a 12.1 kb deletion at the *HMG2* locus. *Genetics* **205**, 955-965 (2017).
33. B.J. Norris, V.A. Whan, A gene duplication affecting expression of the ovine ASIP gene is responsible for white and black sheep. *Genome Res.* **18**, 1282-1293 (2008).

**Table S3.** Examples of evolution of alleles in domestic animals

| Species | Phenotype                      | Gene                            | Allele                            | Mutation                                   | Ref. <sup>d</sup> |
|---------|--------------------------------|---------------------------------|-----------------------------------|--------------------------------------------|-------------------|
| Pig     | Patch                          | <i>KIT</i>                      | <i>Patch</i>                      | a: 450-kb duplication                      | (34)              |
|         | Belt                           |                                 | <i>Belt</i>                       | b: three duplications <sup>a</sup>         | (30,35)           |
|         | Dominant white                 |                                 | <i>Dominant white</i>             | a + b + c: splice mutation                 | (30,36)           |
| Pig     | Dominant black                 | <i>MC1R</i>                     | <i>E<sup>D</sup></i>              | a: missense mutation                       | (37)              |
|         | Black spotting                 |                                 | <i>e<sup>p</sup></i>              | a + b: 2 bp insertion                      | (37)              |
| Chicken | Dominant white                 | <i>PMEL</i>                     | <i>Dominant white</i>             | a: 9 bp insertion                          | (38)              |
|         | Smoky                          |                                 | <i>Smoky</i>                      | a: + b: 12-bp deletion                     | (38)              |
| Chicken | Rose-comb + low sperm motility | <i>MNR2</i><br>+ <i>CCDC108</i> | <i>Rose1</i>                      | a: 7.2-Mb inversion                        | (9)               |
|         | Rose-comb                      |                                 | <i>Rose2<sup>b</sup></i>          | b: non-homologous recombination            | (9)               |
| Chicken | Plumage color                  | <i>MC1R</i>                     | <i>Multiple</i>                   | Various combinations of missense mutations | (39)              |
| Cattle  | Color sidedness                | <i>KIT</i>                      | <i>C<sub>S29</sub></i>            | a: 492-kb translocation                    | (9)               |
|         | Color sidedness                |                                 | <i>C<sub>S6</sub><sup>c</sup></i> | b: 575-kb translocation                    | (9)               |

<sup>a</sup>Not all of the three duplications have to be functionally important, but all three are exclusively found in domestic pigs showing white spotting.

<sup>b</sup>Originating from a recombination event between *Rose1* and a wild-type chromosome.

<sup>c</sup>Originating from a recombination event between *C<sub>S29</sub>* and a wild-type chromosome.

#### <sup>d</sup>References

7. K. Durkin *et al.*, Serial translocation by means of circular intermediates underlies colour sidedness in cattle. *Nature* **482**, 81-84 (2012).
9. F. Inslan *et al.*, The Rose-comb mutation in chickens constitutes a structural rearrangement causing both altered comb morphology and defective sperm motility. *PLoS Genet.* **8**, e1002775 (2012).
30. C.-J. Rubin *et al.*, Strong signatures of selection in the domestic pig genome. *Proc. Natl. Acad. Sci. USA* **109**, 19529-19536 (2012).



34. M. Johansson Moller *et al.*, Pigs with the dominant white coat color phenotype carry a duplication of the *KIT* gene encoding the mast/stem cell growth factor receptor. *Mamm. Genome* **7**, 822-830 (1996).
35. E. Giuffra *et al.*, The Belt mutation in pigs is an allele at the Dominant white (*I/KIT*) locus. *Mamm. Genome* **10**, 1132-1136 (1999).
36. S. Marklund *et al.*, Molecular basis for the dominant white phenotype in the domestic pig. *Genome Res.* **8**, 826-833 (1998).
37. J.M.H. Kijas *et al.*, A frameshift mutation in *MC1R* and a high frequency of somatic reversions cause black spotting in pigs. *Genetics* **158**, 779-785 (2001).
38. S. Kerje *et al.*, The Dominant white, Dun and Smoky color variants in chicken are associated with insertion/deletion polymorphisms in the *PMEL17* gene. *Genetics* **168**, 1507-1518 (2004).
39. L. Andersson *et al.*, "The genetic basis for pigmentation phenotypes in poultry" in *Advances in Poultry Genetics and Genomics*, S. Aggrey, H. Zhou, M. Tixier-Boichard M, D.D. Rhoads, Eds. (Burleigh Dodds, Cambridge, UK, 2020).
